# Supplementary material for: Modeling seismic hazard and landslide occurrence probabilities in northwestern Yunnan, China: exploring complex fault systems with multi-segment rupturing in a block rotational tectonic zone
Source: Copernicus journal article supplement (doi:10.5194/nhess-25-857-2025), 2025-02-25
Supplement: Supplementary file 1 [file nhess-25-857-2025-supplement.pdf]

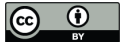

*Supplement of*

**Modeling seismic hazard and landslide occurrence probabilities in northwestern Yunnan, China: exploring complex fault systems with multi-segment rupturing in a block rotational tectonic zone**

**Jia Cheng et al.**

*Correspondence to:* Jia Cheng (jiacheng@cugb.edu.cn, jiacheng@gmail.com)

The copyright of individual parts of the supplement might differ from the article licence.

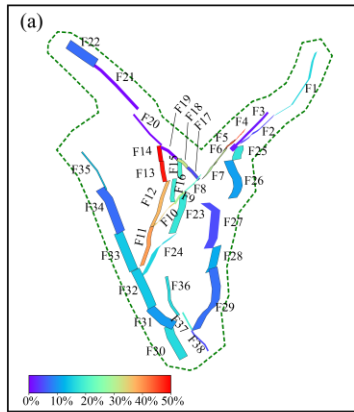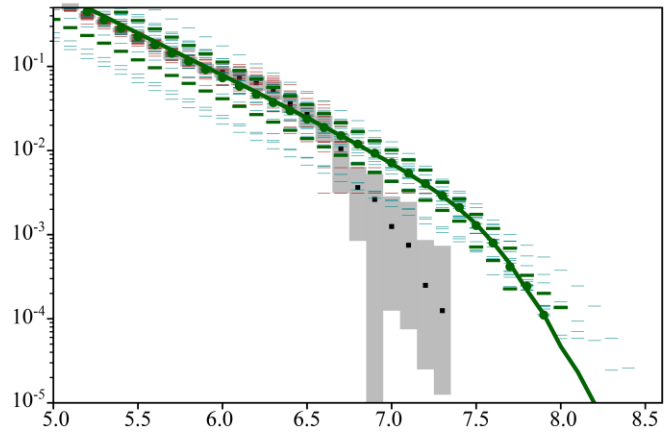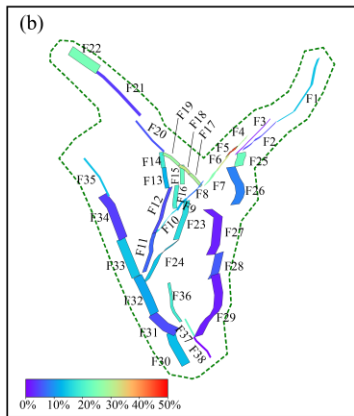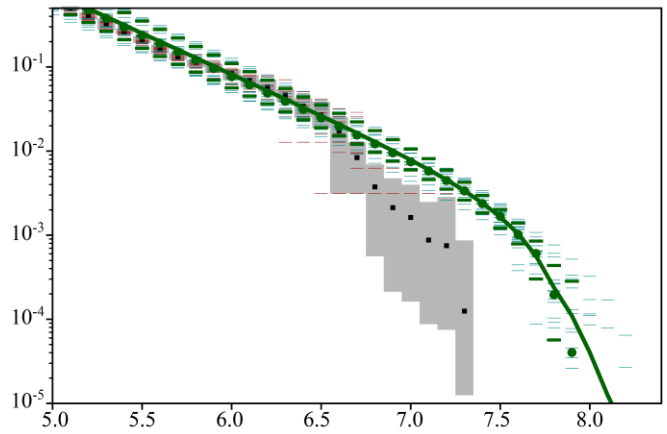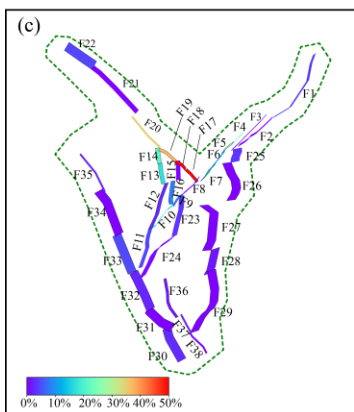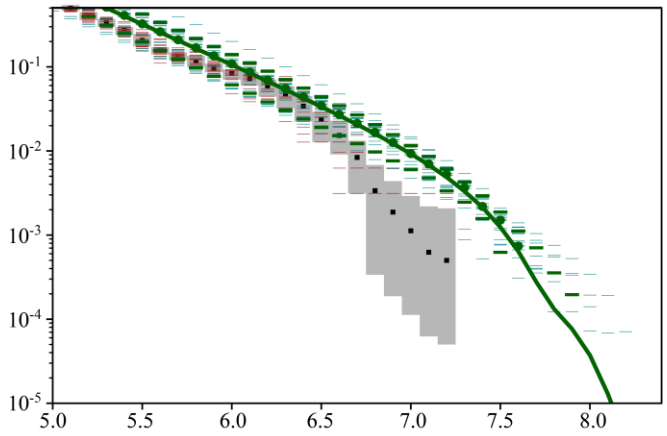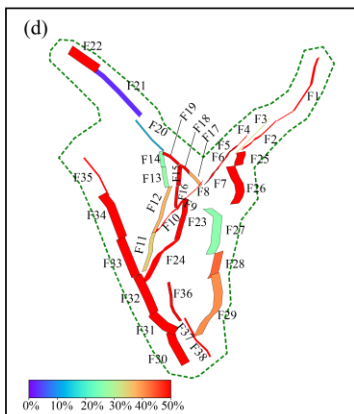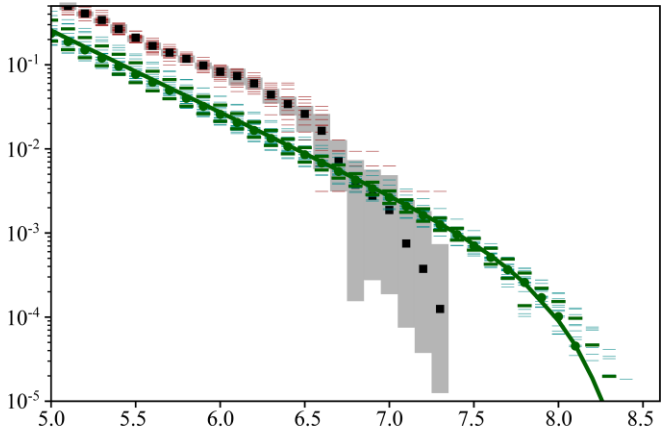

**Figure S1.** Calculated NMS ratios and comparison results for different models using the G-R relation and the scaling relationships from Wells and Coppersmith (1994). **(a)** Modeled Non-Mainshock Slip (NMS) Ratio. **(b)** Comparisons between the historical Seismicity rates for different models. Dashed green lines are the MFD of each model, and the solid green line is the mean MFD, green patches represent the uncertainty (16-84 percentiles). The dotted black line is the rate from the catalog; the dashed red lines are individual Monte Carlo sampled rates of the catalog exploring the uncertainties on the magnitudes of earthquakes, and gray rectangular show the one-sigma uncertainty on the earthquake rates in statistical analysis.

**Table S1.** Rupture Parameters of the Fault Segments in the Northwestern Yunnan Region.

| Fault Name              | Segment No. | Historical events |           | Characteristic EQ. |                 | Paleo-earthquakes                                    | Holocene slip rate (mm/yr) ** |          | Dip       |           | References                            |
|-------------------------|-------------|-------------------|-----------|--------------------|-----------------|------------------------------------------------------|-------------------------------|----------|-----------|-----------|---------------------------------------|
|                         |             | Time              | Mag.      | Length (km)        | Mag.* ( $M_w$ ) |                                                      | Horizontal                    | vertical | Direction | Angle (°) |                                       |
| Lijiang-Xiaojinhe fault | F1          |                   |           | 56                 | 6.9             |                                                      | 2.0±0.7                       | 0.2±0.1  | N         | 80        | Gao et al., 2019                      |
|                         | F2          | 1976              | $M_{6.3}$ | 50                 | 6.8             |                                                      | 1.0±0.7                       | 0.2±0.1  | N         | 80        |                                       |
|                         | F3          |                   |           | 92                 | 7.3             |                                                      | 1.0±0.7                       | 0.2±0.1  | N         | 80        |                                       |
|                         | F4          |                   |           | 17                 | 6.1             |                                                      | 2.1±1.5                       | 0.4±0.2  | N         | 80        |                                       |
|                         | F5          |                   |           | 15                 | 6.0             |                                                      | 3.3±0.5                       | 0.4±0.2  | N         | 75        |                                       |
|                         | F6          |                   |           | 23                 | 6.3             | 7940~6540 a. BP<br>4740~4050 a. BP<br>1830~420 a. BP | 3.3±1.2                       | 0.4±0.2  | N         | 75        | Gao et al., 2019<br>Ding et al., 2018 |
|                         | F7          |                   |           | 21                 | 6.2             | 5120~3200 a. BP<br>2100~1200 a. BP                   | 3.3±1.2                       | 0.4±0.2  | N         | 75        |                                       |
|                         | F8          |                   |           | 25                 | 6.4             | 44980~17660 a. BP<br>7210~3810 a. BP                 | 2.4±0.5                       |          | N         | 75        | Gao et al., 2019<br>Ding et al., 2018 |

|                           |     |      |                          |    |     |                                                                  |         |         |    |                                                                                                                                |
|---------------------------|-----|------|--------------------------|----|-----|------------------------------------------------------------------|---------|---------|----|--------------------------------------------------------------------------------------------------------------------------------|
| 2540~1540 a. BP           |     |      |                          |    |     |                                                                  |         |         |    |                                                                                                                                |
|                           | F9  |      |                          | 16 | 6.0 |                                                                  | 2.4±0.5 | N       | 75 |                                                                                                                                |
|                           | F10 | 1951 | <i>M</i> 6.4             | 42 | 6.7 | $\frac{5980 \pm 560 \text{ a. BP}}{1770 \pm 1000 \text{ a. BP}}$ | 2.4±0.5 | N       | 75 | Gao et al., 2019<br>Ding et al., 2018                                                                                          |
| 10737±468 a. BP           |     |      |                          |    |     |                                                                  |         |         |    |                                                                                                                                |
|                           | F11 | 1751 | <i>M</i> 6.7             | 49 | 6.8 | 6230±130 a. BP                                                   |         | W       | 75 | Institute of<br>Geology-State<br>Seismological<br>Bureau, and<br>Yunnan<br>Seismological<br>Bureau, 1990;<br>Tang et al., 2014 |
| Longpan-<br>Qiaohou fault |     |      |                          |    |     |                                                                  | 2.2±1.2 | 0.2±0.2 |    |                                                                                                                                |
|                           | F12 | 1925 | <i>M</i> 6.1             | 58 | 6.9 |                                                                  |         | W       | 75 |                                                                                                                                |
|                           | F13 |      |                          | 25 | 6.3 |                                                                  |         | W       | 75 | He and Chang,<br>2022                                                                                                          |
|                           | F14 |      |                          | 19 | 6.1 |                                                                  |         | W       | 75 |                                                                                                                                |
| Yulong East<br>fault      | F15 |      |                          | 23 | 6.3 |                                                                  |         | E       | 75 | Zhou et al.,<br>2004; Han et al.,<br>2004                                                                                      |
|                           | F16 | 1990 | <i>M<sub>w</sub></i> 6.6 | 30 | 6.5 |                                                                  | ~0.84   | ~0.70   | E  | 75                                                                                                                             |

|                         |     |                       |                              |    |     |  |  |         |         |    |                                                                                                           |  |
|-------------------------|-----|-----------------------|------------------------------|----|-----|--|--|---------|---------|----|-----------------------------------------------------------------------------------------------------------|--|
|                         | F17 |                       |                              | 15 | 6.0 |  |  |         | W       | 80 |                                                                                                           |  |
|                         | F18 | 1966                  | <i>M</i> 6.4                 | 20 | 6.2 |  |  |         | W       | 80 |                                                                                                           |  |
| Zhongdian<br>fault      | F19 | 1933                  | <i>M</i> 6.3                 | 23 | 6.3 |  |  |         | W       | 80 | Chang et al.,2014; Chang et al., 2023; Cheng et al., 2020a                                                |  |
|                         |     |                       |                              |    |     |  |  |         |         |    |                                                                                                           |  |
|                         |     |                       |                              |    |     |  |  |         |         |    |                                                                                                           |  |
|                         |     |                       |                              |    |     |  |  |         |         |    |                                                                                                           |  |
|                         |     |                       |                              |    |     |  |  |         |         |    |                                                                                                           |  |
|                         |     |                       |                              |    |     |  |  |         |         |    |                                                                                                           |  |
|                         | F20 |                       |                              | 48 | 6.8 |  |  |         | E       | 80 |                                                                                                           |  |
|                         | F21 |                       |                              | 74 | 7.1 |  |  |         | E       | 80 |                                                                                                           |  |
|                         | F22 | 1961                  | <i>M</i> 6.1                 | 39 | 6.6 |  |  |         | E       | 80 |                                                                                                           |  |
|                         |     |                       |                              |    |     |  |  |         |         |    |                                                                                                           |  |
|                         |     |                       |                              |    |     |  |  |         |         |    |                                                                                                           |  |
|                         |     |                       |                              |    |     |  |  |         |         |    |                                                                                                           |  |
|                         |     |                       |                              |    |     |  |  |         |         |    |                                                                                                           |  |
|                         | F23 |                       |                              | 49 | 6.8 |  |  |         | W       | 80 | Institute of Geology-State Seismological Bureau, and Yunnan Seismological Bureau, 1990; Han et al., 2005; |  |
|                         |     |                       |                              |    |     |  |  |         |         |    |                                                                                                           |  |
| Heqing-<br>Eryuan fault | F24 | 1839-2-7<br>1839-2-23 | <i>M</i> 6.3<br><i>M</i> 6.3 | 60 | 7.0 |  |  | 2.0±1.0 | 0.7~1.0 | W  | 80                                                                                                        |  |







|                            |     |           |              |    |     |             |           |         |   |    |                                           |
|----------------------------|-----|-----------|--------------|----|-----|-------------|-----------|---------|---|----|-------------------------------------------|
| Weishan fault              | F34 |           |              | 58 | 6.9 | 28000 a. BP |           |         | W | 80 | 2016;2022                                 |
|                            | F35 |           |              | 54 | 6.9 |             |           |         | W | 80 |                                           |
| Diancangshan<br>East fault | F36 | 1925      | <i>M</i> 6.9 | 50 | 6.8 | 62 a BP     | /         | 1.5±0.5 | E | 80 | Guo et al., 1984;<br>Zhou et al.,<br>2004 |
|                            |     | 1515      | <i>M</i> 6.1 |    |     | 474 a BP    |           |         |   |    |                                           |
|                            |     |           |              |    |     | ≥2070 a. BP |           |         |   |    |                                           |
|                            |     |           |              |    |     | 2700 a BP   |           |         |   |    |                                           |
|                            |     |           |              |    |     | 5500 a. BP  |           |         |   |    |                                           |
|                            |     | 6500 a.BP |              |    |     |             |           |         |   |    |                                           |
|                            |     |           |              |    |     | ≤10800 a BP |           |         |   |    |                                           |
| Red River<br>fault         | F37 | 1623      | <i>M</i> 6.3 | 23 | 6.3 |             | 1.1 ± 0.4 | /       | W | 80 | Shi et al., 2018                          |
|                            | F38 | 1625      | <i>M</i> 6.8 | 32 | 6.5 |             | 1.1 ± 0.4 | /       | W | 80 | Shi et al., 2018;<br>Li et al., 2016      |

\* denotes the magnitude of characteristic earthquake is from the scaling law of Cheng et al. (2020b), while \*\* Left lateral strike slip rate and normal slip rate are positive, respectively.

## References

- Chang, Z., Zhang, Y., Li, J., and Zang, Y.: The Geological and Geomorphic Characteristic of Late Quaternary Activity of the Deqin-Zhongdian-Daju Fault, *Journal of Seismological Research*, 37, 46-52, 2014 (in Chinese with English abstract).
- Chang, Z., Chang, H., Zang, Y., and Dai, B.: Recent active features of Weixi-Qiaohou fault and its relationship with the Honghe fault, *Journal of Geomechanics*, 22, 517-530, 2016 (in Chinese with English abstract).
- Chang, Z., Li, J., Chang, H., Luo, L., Liu, C., and He, S.: Late-Quaternary Activity of Tongdian-Madeng Basin Segment of Weixi-Qiaohou Fault, *Acta Scientiarum Naturalium Universitatis Pekinensis*, 58, 5, <https://doi.org/10.13209/j.0479-8023.2022.057>, 2022 (in Chinese with English abstract).
- Chang, C., Chang, C., Gao, J., and Chan, C.: Quantifying the probability and uncertainty of multiple-structure rupture for Taiwan, *Terrestrial, Atmospheric, and Oceanic Sciences*, 34, <https://doi.org/10.1007/s44195-023-00040-9>, 2023.
- Cheng, L., Li, G., Hu, H., Yu, J., and Su, G.: A preliminary study of Paleo-earthquake in the Majiacun-Daju section of Zhongdian-Daju fault, Yunnan Province, *Earthquake Research in China*, 36, 2, 211-220, 2020a (in Chinese with English abstract).
- Cheng, J., Rong, Y., Magistrale, H., Chen, G., and Xu, X.: Earthquake rupture scaling relations for mainland China, *Seismological Research Letters*, 91, 248-261, 2020b.

- Ding, R., Ren, J., Zhang, S., Lu, Y., and Liu, H.: Late Quaternary Paleoearthquakes on the Middle segment of the Lijiang-Xiaojinhe fault, Southeastern Tibet, *Seismology and Geology*, 40, 622-640, 2018 (in Chinese with English abstract).
- Gao, Y., Ding, R., Zhang, S., and Ren, J.: Slip rate of Lijiang-Xiaojinhe fault in the Holocene, *Technology for Earthquake Disaster Prevention*, 14, 617-627, 2019 (in Chinese with English abstract).
- Guo, S., Zhang, J., Li, X., Xiang, H., Chen, T., and Zhang, G.: Fault displacement and recurrence intervals of earthquakes at the northern segment of the Honghe fault zone, Yunnan Province, *Seismology and Geology*, 6, 1-12, 1984 (in Chinese with English abstract).
- Han, Z., Xiang, H., and Guo, S.: Sinistral shear and extension of the northern section of Lijiang Basin in northwest Yunnan in Quaternary, *Chinese Science Bulletin*, 50, 452-459, 2005.
- He, F., and Chang, Z.: Late Quaternary activity characteristics of the Taoyuan section of Longpan-Qiaohou fault zone in northwest Yunnan, *China Earthquake Engineering Journal*, 44, 3, 579-591, 2022 (in Chinese with English abstract).
- Huang, X., Wu, Z., Huang, X., and Luo, R.: Tectonic Geomorphology constrains on Quaternary Activity and Segmentation along Chenghai-Binchuan Fault zone in Northwest Yunnan, China, *Earth Science*, 43, 4651-4670, 2018 (in Chinese with English abstract).
- Institute of Geology-State Seismological Bureau, and Yunnan Seismological Bureau: *Active faults in Northwestern Yunnan Region*, Seismological Press, Beijing, China, 1-304, 1990 (in Chinese with English abstract).

- Li, X., Ran, Y., Chen, L., Wang, H., Yu, J., Zhang, Y., and Xie, Y.: The Holocene seismic evidence on southern segment of the Red River fault zone, *Seismology and Geology*, 38, 3, 596-604, 2016 (in Chinese with English abstract).
- Ren, J., Zhang, S., Hou, Z., and Liu, X.: Study of Late Quaternary slip rate in the Mid-Segment of the Tongdian-Weishan fault, *Seismology and Geology*, 29, 756-764, 2007 (in Chinese with English abstract).
- Shi, X., Sieh, K., Weldon, R., Zhu, C., Han, Y., Yang, J., and Robinson, S.: Slip rate and rare large prehistoric earthquakes of the Red River fault, southwestern China, *Geochemistry, Geophysics, Geosystems*, 19, <https://doi.org/10.1029/2017GC007420>, 2018.
- Sun, C., Li, D., Shen, X., Kang, Y., Liu, R., and Zhang, Y.: Holocene activity evidence on the southeast boundary fault of Heqing basin, middle segment of Heqing-Eryuan fault zone, West Yunnan Province, China, *Journal of Mountain Science*, 14, 1445-1453, 2017.
- Tang, Y., Hu, C., Tian, Q., Wang, L., Yang, P., and Xiong, R.: A Preliminary Study of Paleo-earthquakes in the Jianchuan Section of Longpan-Qiaohou Fault Zone, Yunnan Province, *Earthquake*, 34, 117-124, 2014 (in Chinese with English abstract).
- Tang, F., Ma, H., and Song, J.: Study on the Late Quaternary activity of Chenghai fault zone, *Proceeding of the 16<sup>th</sup> World conference on earthquake engineering*, Santiago, Chile, 1-9, 2017.
- Wells, D., and Coppersmith, K.: New empirical relationships among magnitude, rupture length, rupture width, rupture area, and surface displacement, *Bulletin of Seismological Society of America*, 84, 974-1002, 1994.

- Wu, X., Xu, X., Yu, G., Ren, J., Yang, X., Chen, G., Xu, C., Du, K., Huang, X., Yang, H., Li, K., and Hao, H.: China Active Faults Database and its web system, *Earth System Science Data*, <https://doi.org/10.5194/essd-2023-119>, 2023.
- Yu, W., Zhang, J., Zhou, G., Wang, J., and Zeng, X.: Surface Rupture of the 2001 Yongsheng *M*<sub>6</sub> Earthquake and Chenghai Fault, *Journal of Seismological Research*, 28, 125-128, 2005 (in Chinese with English abstract).
- Zhou, Q., Guo, S., and Xiang, H.: Principle and method of delineation of potential seismic sources in northeastern Yunnan Province, *Seismology and Geology*, 26, 761-771, 2004 (in Chinese with English abstract).
